# Supplementary material for: Freshwater non-native species' population dynamics are synchronized with functionally similar natives
Source: Research Square preprint supplement (doi:10.21203/rs.3.rs-5479338/v1), 2024-12-04
Supplement: Supplementary file 1 [file f067253a6ee3412207212146.docx]

**Freshwater non-native species' population dynamics are synchronized with functionally similar natives**

Barbbara Silva Rocha¹, Amanda Cantarute Rodrigues², Rafaela Vendrametto Granzotti³

¹ Environmental Sciences Department, Federal University of São Carlos, São Carlos, SãoPaulo, Brazil

²UMR5300 CRBE (Centre de Recherche sur la Biodiversité et l’Environnement), CNRS 5174, IRD253, UPS, 118 route de Narbonne, F-31062, Toulouse, France. ORCID: 0000-0003-0533-9479

³Programa DTI/CNPq, Instituto Nacional de Ciência e Tecnologia em Ecologia, Evolução e Conservação da Biodiversidade (EECBio), Universidade Federal de Goiás, 74690-900, Goiânia, GO, Brazil

**SUPPLEMENTARY MATERIAL**


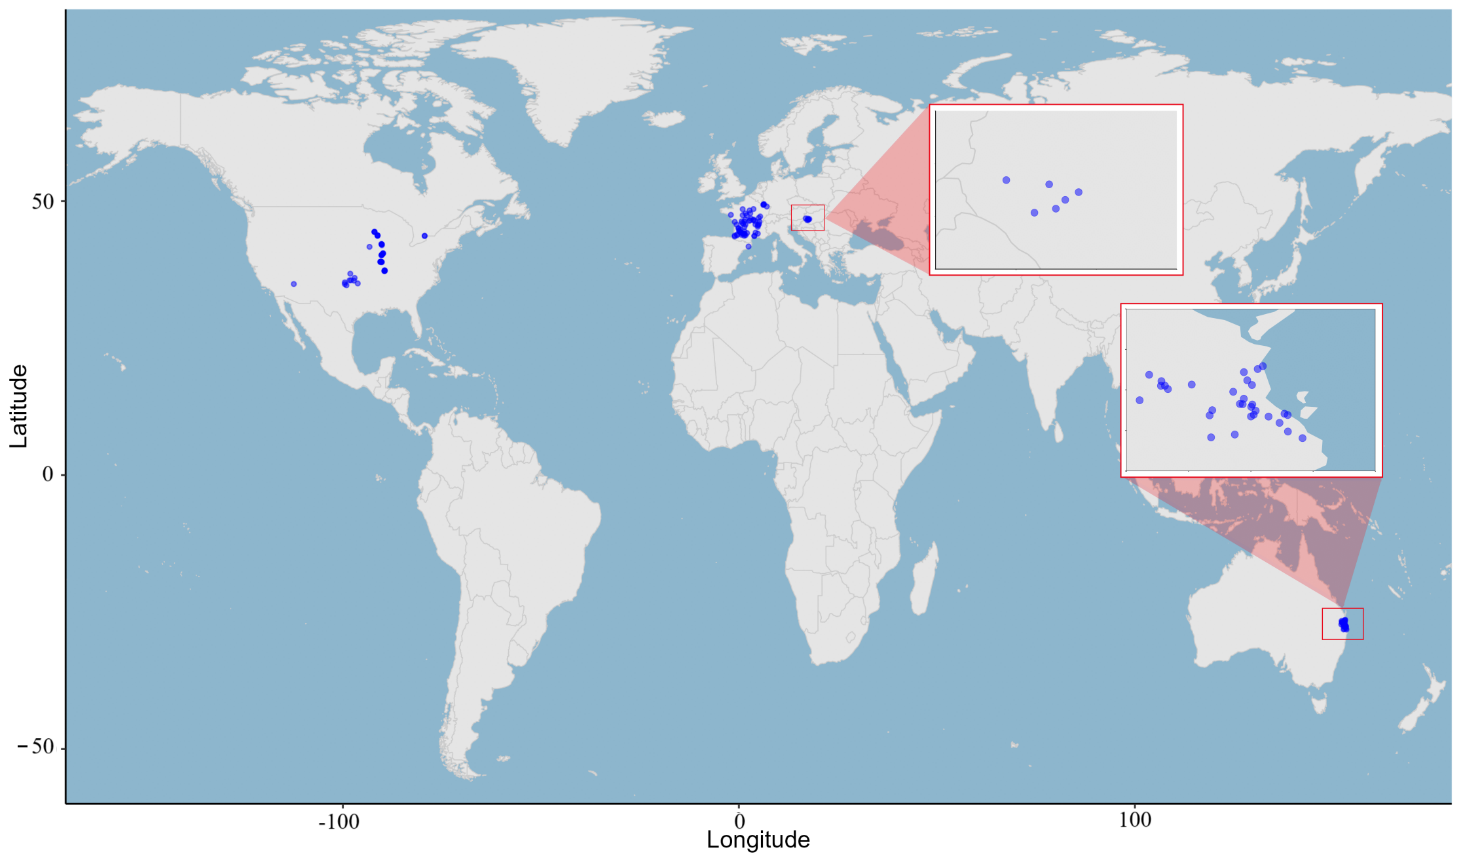


**Figure S1.** The 153 sampling sites selected from the RivFishTime dataset (Comte et al., 2020).

**Table S1.** Summary of time series data analyzed in this study. N = 153 sampling sites.

| **RivFishTime sites code** | **Country code** | **Number of non-native species analyzed** | **Number of native species analyzed** | **Number of years in the time series** |
| --- | --- | --- | --- | --- |
| G1012 | USA | 1 | 17 | 25 |
| G1014 | USA | 1 | 24 | 26 |
| G1020 | USA | 3 | 24 | 26 |
| G1021 | USA | 1 | 24 | 26 |
| G1022 | USA | 2 | 25 | 26 |
| G1023 | USA | 1 | 17 | 26 |
| G1024 | USA | 2 | 26 | 26 |
| G1025 | USA | 1 | 18 | 26 |
| G1026 | USA | 1 | 37 | 26 |
| G1028 | USA | 2 | 16 | 25 |
| G1029 | USA | 1 | 15 | 25 |
| G1030 | USA | 3 | 23 | 26 |
| G1031 | USA | 1 | 21 | 26 |
| G1033 | USA | 3 | 34 | 26 |
| G1034 | USA | 2 | 37 | 26 |
| G1035 | USA | 3 | 30 | 26 |
| G1036 | USA | 3 | 33 | 26 |
| G1037 | USA | 3 | 29 | 26 |
| G1038 | USA | 3 | 28 | 26 |
| G1039 | USA | 3 | 24 | 25 |
| G1040 | USA | 2 | 27 | 25 |
| G1041 | USA | 1 | 2 | 25 |
| G1042 | USA | 1 | 19 | 26 |
| G1043 | USA | 2 | 22 | 26 |
| G1044 | USA | 2 | 21 | 24 |
| G1045 | USA | 1 | 20 | 24 |
| G1046 | USA | 2 | 25 | 26 |
| G1047 | USA | 2 | 27 | 26 |
| G1048 | USA | 1 | 18 | 26 |
| G1049 | USA | 1 | 15 | 26 |
| G1050 | USA | 1 | 33 | 26 |
| G1052 | USA | 1 | 30 | 26 |
| G1054 | USA | 1 | 20 | 26 |
| G1055 | USA | 1 | 32 | 26 |
| G1060 | USA | 1 | 37 | 26 |
| G1062 | USA | 1 | 25 | 26 |
| G1064 | USA | 1 | 33 | 26 |
| G1066 | USA | 1 | 23 | 26 |
| G1067 | USA | 1 | 37 | 26 |
| G1071 | USA | 1 | 23 | 26 |
| G1073 | USA | 1 | 29 | 26 |
| G12189 | USA | 1 | 5 | 15 |
| G7159 | USA | 1 | 15 | 18 |
| G7162 | USA | 1 | 11 | 19 |
| G7163 | USA | 1 | 12 | 18 |
| G7165 | USA | 1 | 13 | 17 |
| G7166 | USA | 1 | 12 | 18 |
| G7167 | USA | 1 | 17 | 19 |
| G7176 | USA | 1 | 14 | 19 |
| G7177 | USA | 1 | 19 | 18 |
| G7180 | USA | 1 | 14 | 19 |
| G738 | USA | 1 | 11 | 11 |
| G106 | HUN | 1 | 5 | 12 |
| G111 | HUN | 2 | 6 | 12 |
| G114 | HUN | 1 | 6 | 12 |
| G118 | HUN | 3 | 8 | 11 |
| G133 | HUN | 1 | 1 | 12 |
| G137 | HUN | 2 | 8 | 12 |
| G7264 | FRA | 2 | 12 | 25 |
| G7266 | FRA | 2 | 9 | 14 |
| G7273 | FRA | 1 | 11 | 14 |
| G7423 | FRA | 1 | 14 | 11 |
| G7445 | FRA | 2 | 16 | 11 |
| G7456 | FRA | 1 | 13 | 17 |
| G7486 | FRA | 1 | 14 | 11 |
| G7500 | FRA | 2 | 13 | 11 |
| G7611 | FRA | 1 | 9 | 12 |
| G7615 | FRA | 2 | 12 | 11 |
| G7616 | FRA | 1 | 12 | 13 |
| G7626 | FRA | 2 | 11 | 12 |
| G7644 | FRA | 1 | 16 | 13 |
| G7649 | FRA | 2 | 7 | 11 |
| G7701 | FRA | 1 | 17 | 29 |
| G7928 | FRA | 1 | 11 | 12 |
| G7982 | FRA | 1 | 11 | 19 |
| G8000 | FRA | 1 | 7 | 14 |
| G8001 | FRA | 1 | 6 | 11 |
| G8066 | FRA | 1 | 7 | 24 |
| G8067 | FRA | 2 | 6 | 13 |
| G8070 | FRA | 1 | 5 | 12 |
| G8071 | FRA | 1 | 6 | 24 |
| G8076 | FRA | 1 | 5 | 13 |
| G8085 | FRA | 1 | 5 | 13 |
| G8088 | FRA | 1 | 1 | 13 |
| G8091 | FRA | 1 | 10 | 23 |
| G8140 | FRA | 1 | 11 | 22 |
| G8141 | FRA | 1 | 8 | 13 |
| G8142 | FRA | 1 | 11 | 13 |
| G8143 | FRA | 1 | 10 | 31 |
| G8148 | FRA | 1 | 15 | 16 |
| G8241 | FRA | 1 | 7 | 24 |
| G8245 | FRA | 1 | 9 | 24 |
| G8248 | FRA | 1 | 7 | 12 |
| G8249 | FRA | 1 | 12 | 12 |
| G8252 | FRA | 1 | 7 | 24 |
| G8253 | FRA | 2 | 8 | 23 |
| G8254 | FRA | 1 | 9 | 23 |
| G8264 | FRA | 1 | 7 | 13 |
| G8287 | FRA | 1 | 4 | 11 |
| G8302 | FRA | 1 | 7 | 23 |
| G8309 | FRA | 1 | 6 | 23 |
| G8320 | FRA | 2 | 5 | 24 |
| G8365 | FRA | 2 | 12 | 11 |
| G8412 | FRA | 1 | 6 | 11 |
| G8421 | FRA | 2 | 7 | 23 |
| G8425 | FRA | 1 | 5 | 23 |
| G8458 | FRA | 2 | 10 | 11 |
| G8564 | FRA | 1 | 9 | 13 |
| G8573 | FRA | 1 | 7 | 12 |
| G8574 | FRA | 1 | 3 | 11 |
| G8576 | FRA | 2 | 6 | 13 |
| G8612 | FRA | 1 | 8 | 11 |
| G8662 | FRA | 1 | 11 | 11 |
| G8696 | FRA | 3 | 13 | 23 |
| G8697 | FRA | 2 | 16 | 23 |
| G8708 | FRA | 3 | 13 | 19 |
| G8718 | FRA | 2 | 9 | 10 |
| G8726 | FRA | 1 | 3 | 17 |
| G8813 | FRA | 3 | 13 | 11 |
| G12792 | ESP | 1 | 3 | 17 |
| G9067 | CAN | 1 | 5 | 14 |
| G9068 | CAN | 1 | 5 | 14 |
| G158 | AUS | 1 | 3 | 11 |
| G162 | AUS | 1 | 5 | 16 |
| G163 | AUS | 1 | 4 | 16 |
| G168 | AUS | 1 | 3 | 16 |
| G171 | AUS | 2 | 4 | 11 |
| G174 | AUS | 2 | 4 | 16 |
| G176 | AUS | 2 | 6 | 16 |
| G178 | AUS | 2 | 5 | 16 |
| G179 | AUS | 1 | 2 | 16 |
| G180 | AUS | 2 | 4 | 16 |
| G181 | AUS | 2 | 3 | 16 |
| G186 | AUS | 1 | 1 | 12 |
| G187 | AUS | 1 | 5 | 16 |
| G190 | AUS | 1 | 4 | 16 |
| G192 | AUS | 1 | 3 | 16 |
| G193 | AUS | 1 | 5 | 16 |
| G196 | AUS | 1 | 7 | 16 |
| G205 | AUS | 1 | 6 | 16 |
| G221 | AUS | 1 | 11 | 16 |
| G226 | AUS | 2 | 3 | 16 |
| G229 | AUS | 2 | 4 | 16 |
| G233 | AUS | 1 | 5 | 15 |
| G239 | AUS | 2 | 3 | 15 |
| G250 | AUS | 1 | 1 | 16 |
| G259 | AUS | 2 | 4 | 10 |
| G260 | AUS | 2 | 3 | 14 |
| G264 | AUS | 3 | 4 | 12 |
| G266 | AUS | 2 | 5 | 16 |
| G269 | AUS | 1 | 5 | 16 |
| G274 | AUS | 2 | 4 | 16 |
| G282 | AUS | 2 | 2 | 12 |

**Table S2**. Functional traits used in the analysis, their definition and potential link with fish functions.

| **Trait class** | **Functional trait** | **Trait definition** | **Reference** |
| --- | --- | --- | --- |
| **Morphology** | *Maximum body length* | Maximum length. Could be related to metabolism, trophic impacts, locomotion ability, nutrient cycling | FISHMORPH (Brosse et al., 2021) |
|  | *Body elongation (BEl)* | Hydrodynamism |
|  | *Vertical eye position (VEp)* | Position of fish and/or of its prey in the water column |
|  | *Relative eye size (REs)* | Visual acuity |
|  | *Oral gape position (OGp)* | Feeding position in the water column |
|  | *Relative maxillary length (RMl)* | Size of mouth and strength of jaw |
|  | *Body lateral shape (BLs)* | Hydrodynamism and head size |
|  | *Pectoral fin vertical position (PFv)* | Pectoral fin use for swimming |
|  | *Pectoral fin size (PFs)* | Pectoral fin use for swimming |
|  | *Caudal peduncle throttling (CPt)* | Caudal propulsion efficiency through reduction of drag |
| **Life-history** | *Parental care* | Presence or absence of care with eggs and/or offspring | FishBase (Froese & Pauly, 2023) |
|  | *Fertilization* | Internal or external fertilization |
|  | *Maximum fecundity* | Maximum number of eggs |
|  | *Minimal age at maturation* | First age reported of a mature individual |
|  | *Longevity* | Oldest individual age reported |
| **Ecology - niche** | *Trophic level* | The position of species within a food web | FishBase (Froese & Pauly, 2023) |
|  | *Type of habitat* | Preferred aquatic habitat for the species (benthopelagic, pelagic, pelagic-neritic, demersal) reflecting their environmental preferences |

**Table S3.** Summary statistics of pairwise interspecific synchrony values (Spearman correlations) for each non-native species analyzed in this study.

| **Non-native species** | **Mean±SD** | **Median** | **Minimum** | **Maximum** |
| --- | --- | --- | --- | --- |
| *Ameiurus melas* | 0.074±0.29 | 0.101 | -0.682 | 0.755 |
| *Ctenopharyngodon idella* | -0.037±0.21 | -0.046 | -0.604 | 0.720 |
| *Cyprinus carpio* | 0.090±0.26 | 0.088 | -0.615 | 0.893 |
| *Gambusia holbrooki* | -0.005±0.29 | -0.005 | -0.738 | 0.806 |
| *Hypophthalmichthys molitrix* | -0.029±0.25 | -0.045 | -0.516 | 0.718 |
| *Lepomis gibbosus* | 0.104±0.31 | 0.085 | -0.727 | 0.979 |
| *Pseudorasbora parva* | 0.062±0.32 | 0.073 | -0.651 | 0.804 |
| *Xiphophorus hellerii* | 0.067±0.35 | 0.118 | -0.650 | 0.915 |
